# Supplementary material for: Multiple SARS-CoV-2 Introductions Shaped the Early Outbreak in Central Eastern Europe: Comparing Hungarian Data to a Worldwide Sequence Data-Matrix
Source: MDPI journal article supplement (doi:10.3390/v12121401), 2020-12-06
Supplement: s1 [file s1]

## Supplementary Data

### Degree distribution

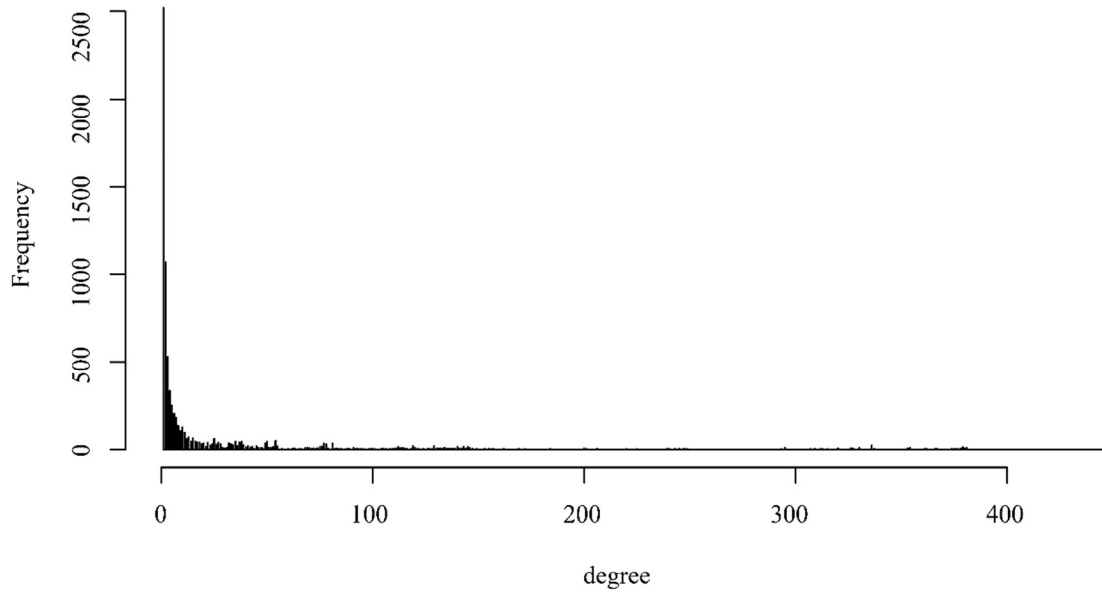

**Supplementary Figure 1.** | Degree distribution representing the haplotype network analysis

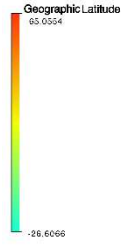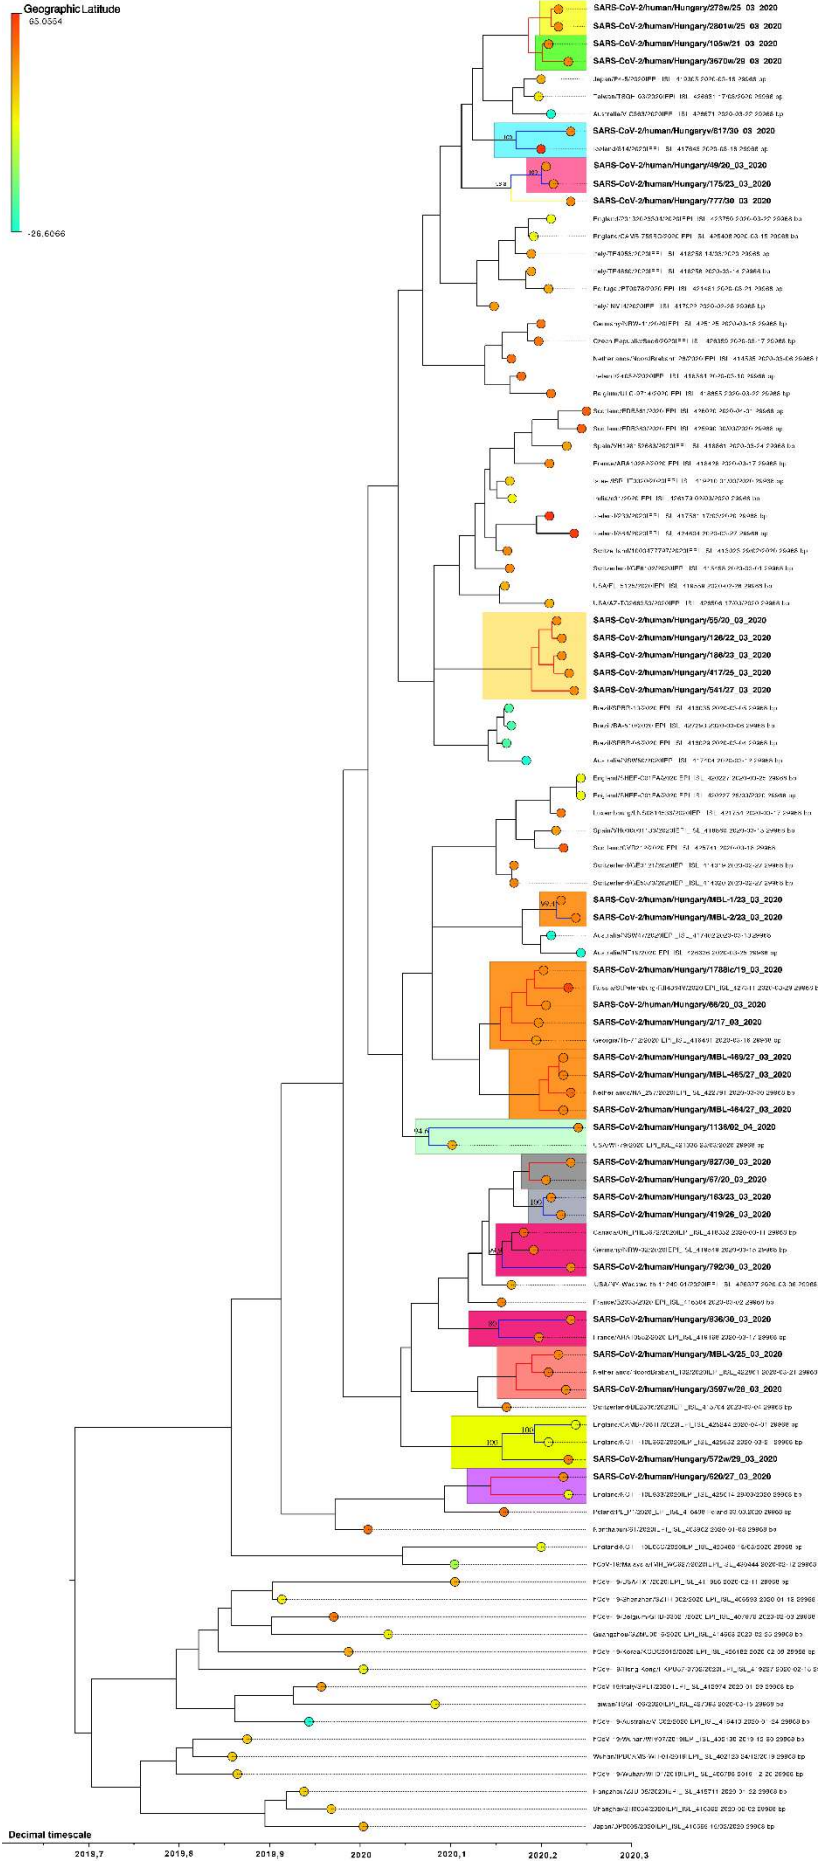

**Supplementary Fig. 2** | Time calibrated phylogenetic and phylogeographic visualization of 105 complete SARS-CoV-2 genomes compared to the 32 Hungarian strains. Sequences of this study are highlighted in bold face, colored clades are representing Nextstrain analysis clustering.

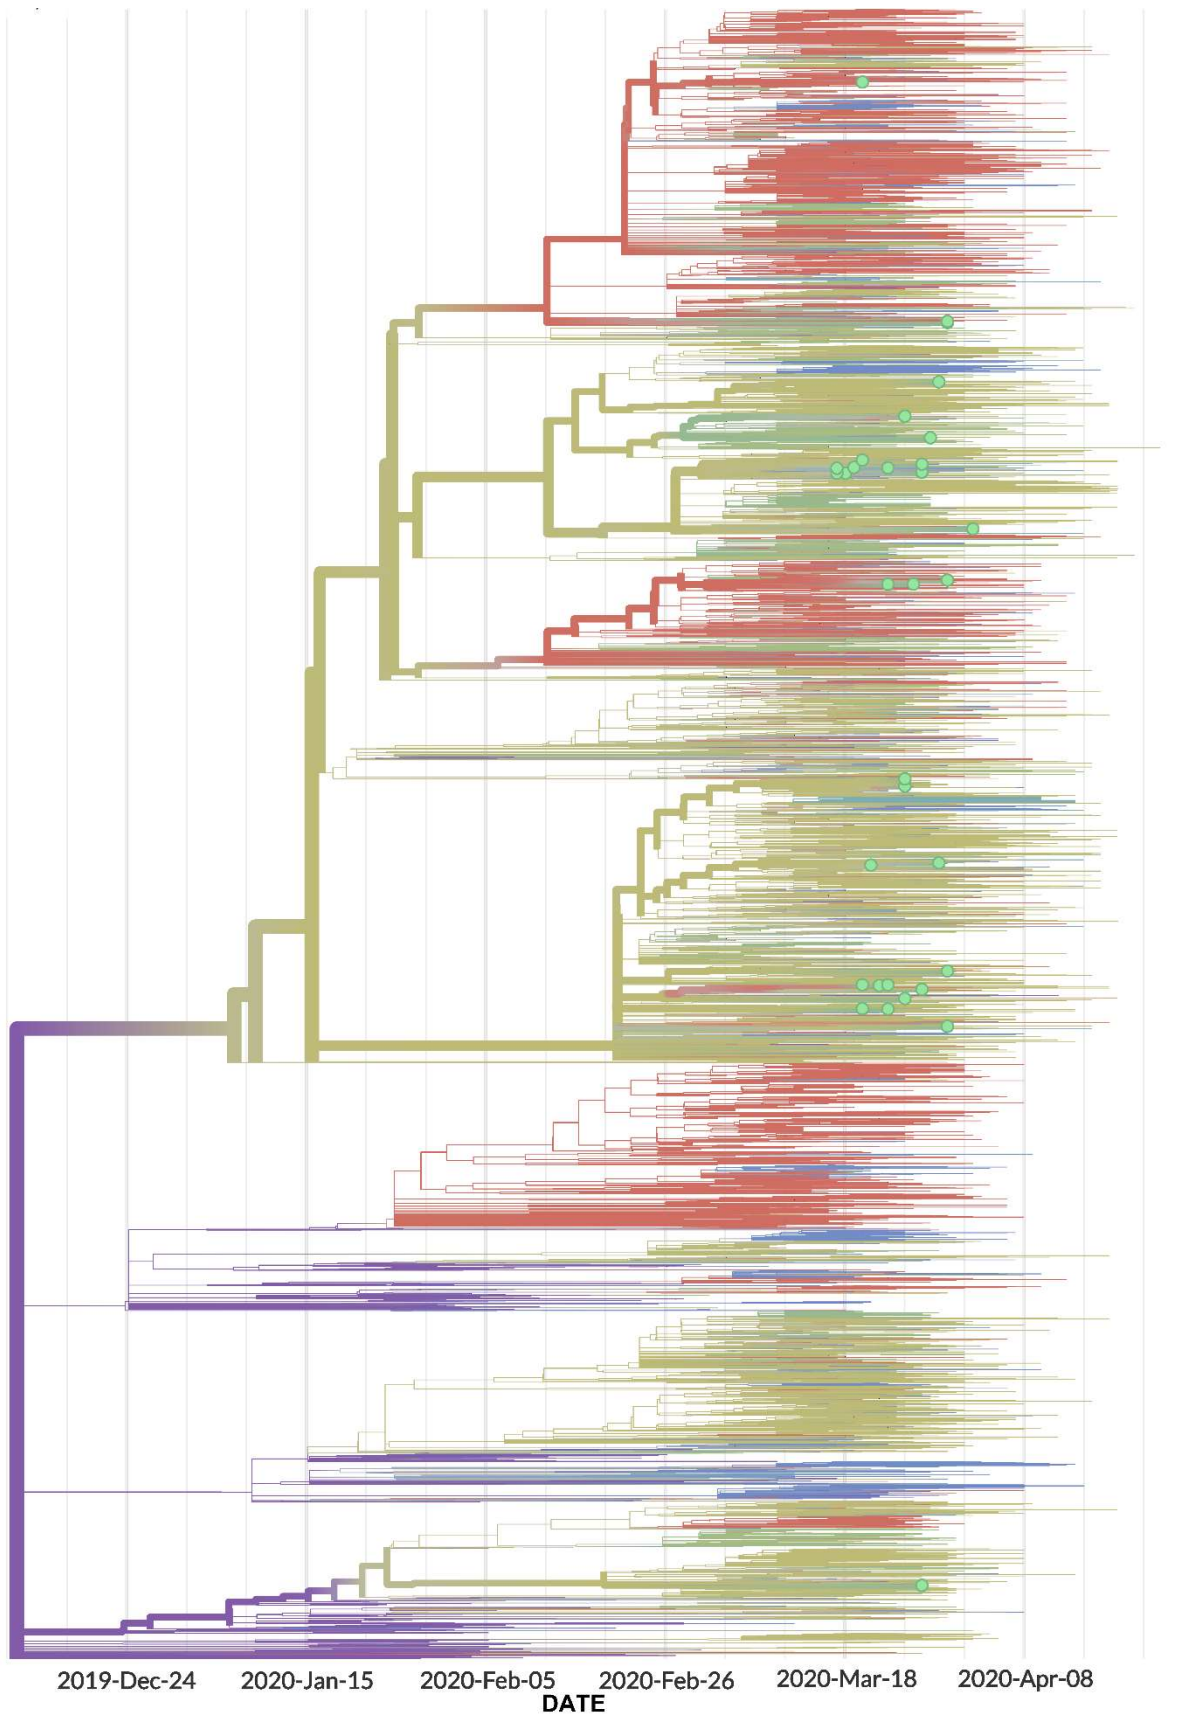

**Supplementary Fig. 3** | Visualization of Hungarian sequence dataset with Nextstrain local workflow. Showing 35 (32 from this manuscript and three additional from GISAID database) Hungarian sequences compared to 10,869 genomes sampled between Mar 2020 and Apr 2020.
